# Supplementary material for: Genome-wide profiles of H3K9me3, H3K27me3 modifications, and DNA methylation during diapause of Asian corn borer ( Ostrinia furnacalis )
Source: HighWire-hosted journal article supplement (doi:10.1101/gr.278661.123), 2024-05-01
Supplement: Supplemental_Data.xlsx [file Supplemental_Data.xlsx]

## Sheet: Figure 1A
Figure 1A	Boxed areas marked in red are shown in Fig. 1A.
	Relative gray value
	non-diapause	diapause
Replicate #1	0.703425	0.276956
Replicate #2	0.830385	0.145503
Replicate #3	0.648167	0.247061

## Sheet: Figure 1B
Figure 1B	Boxed areas marked in red are shown in Fig. 1B.
	Relative gray value
	non-diapause	diapause
Replicate #1	1.07601	0.642112
Replicate #2	1.16996	0.572053
Replicate #3	1.10689	0.234902

## Sheet: Figure 1C
Figure 1C	Boxed areas marked in red are shown in Fig. 1C.
	Relative gray value
	non-diapause	diapause
Replicate #1	0.881206	0.751986
Replicate #2	0.766597	0.698986
Replicate #3	0.719889	0.593434

## Sheet: Figure 1D
Figure 1D	Boxed areas marked in red are shown in Fig. 1D.
	Relative gray value
	non-diapause	diapause
Replicate #1	1.34974	1.52753
Replicate #2	1.28771	1.1535
Replicate #3	1.18464	1.07877

## Sheet: Figure 1E
Figure 1E	Boxed areas marked in red are shown in Fig. 1E.
	Relative gray value
	non-diapause	diapause
Replicate #1	0.869145	1.09394
Replicate #2	0.886673	1.05216
Replicate #3	0.938606	0.87443

## Sheet: Figure 1F
Figure 1F	Newly molted 4th instar larvae were fed artiﬁcial diets containing 0 mg/kg and 5 mg/kg SUV39H2-like (Homologous to SU(VAR3-9) of D. melanogaster) inhibitor Chaetocin, respectively. The results showed that Chaetocin alleviated diapause caused by adverse environment.
	Chaetocin
	0 mg/kg	5 mg/kg
Replicate #1	56.3	37.5	diapause (%)
Replicate #2	57.5	38.9
Replicate #3	52.5	21.7
Replicate #4	61	37.5

## Sheet: Figure 1G
Figure 1G	Newly molted 4th instar larvae were fed artiﬁcial diets containing 0 mg/kg and 10 mg/kg E(Z) inhibitor Tazemetostat, which is homologous to E(Z) of D. melanogaster. The results indicated that Tazemetostat exacerbated diapause caused by adverse environmental conditions.
	Tazemetostat
	0 mg/kg	10 mg/kg
Replicate #1	60	72.5	diapause (%)
Replicate #2	56	78.7
Replicate #3	55.6	76.7

## Sheet: Figure 7A
Figure 7A	Relative expression changes of genes in juvenile hormone (JH) pathway after treatment with 5 mg/kg SUV39H2-like inhibitor Chaetocin and 10 mg/kg E(Z) inhibitor Tazemetostat compared to DMSO controls.
	DMSO	Tazemetostat								DMSO	Chaetocin
		LOC114366772	LOC114358728	LOC114365517	LOC114365530	LOC114360096	LOC114362450	LOC114359032			LOC114366772	LOC114358728	LOC114365517	LOC114365530	LOC114360096	LOC114362450	LOC114359032
Replicate #1	1.15868	0.993033	0.400866	0.824214	2.38748	1.33249	1.13274	1.16711		1.15868	4.76175	0.846756	0.579838	0.940926	1.46005	4.75959	0.835472
	0.782408	1.14861	0.379977	0.963213	1.87681	1.60502	0.996193	1.18463		0.782408	3.32142	0.896365	0.843693	1.24319	1.64252	2.41847	1.10375
	1.10307	0.768137	0.318291	0.80577	1.54863	1.5096	0.660941	0.932669		1.10307	1.60613	1.09319	0.651085	1.50403	1.6107	1.74474	0.86625
Replicate #2	0.894039	0.990132	0.403444	0.968113	1.22723	1.70926	1.12728	1.04616		0.894039	1.46148	0.652213	1.3476	1.38381	1.46854	2.52146	0.98608
	0.874755	0.836282	0.48814	1.01869	2.07026	1.55765	1.0783	0.919534		0.874755	1.63535	0.730225	1.09802	1.02842	1.45158	2.3321	0.974986
	1.27867	0.913332	0.364787	0.955957	1.91614	1.70406	1.06506	1.1283		1.27867	2.28374	0.876518	1.43031	1.18581	1.35597	2.43529	1.1501
Replicate #3	0.87531	1.09523	0.366444	0.882229	1.71353	2.68636	1.24308	1.01638		0.87531	2.07786	0.773922	1.17769	0.986116	1.58222	3.77888	0.830609
	1.06117	1.17478	0.442688	1.0075	1.63575	2.40084	1.26625	1.06002		1.06117	2.319	0.724863	1.18782	0.962629	1.81066	3.14081	0.778866
	1.0766	1.21957	0.371687	1.01548	1.46626	2.68421	1.10175	0.742351		1.0766	1.48558	0.852909	1.29068	0.676193	2.11587	4.29792	0.91787

## Sheet: Figure 7B
Figure 7B	Percentage of diapause was significantly changed by treatment of 0.01 mg/kg juvenile hormone with or without 5 mg/kg SUV39H2-like inhibitor Chaetocin or 10 mg/kg E(Z) inhibitor Tazemetostat, respectively.
	DMSO	JH	JH and Chaetocin	JH and Tazemetostat
Replicate #1	36.5	95.2	100	100	diapause (%)
Replicate #2	37.3	93.6	95.9	95.5
Replicate #3	45.3	94.1	97.5	97.1
